# Supplementary material for: Cannabinoid Actions on Neural Stem Cells: Implications for Pathophysiology
Source: PubMed Central journal article supplement (PMC6480122; doi:10.3390/molecules24071350), 2019-04-05
Supplement: molecules-24-01350-s001.pdf [file molecules-24-01350-s001.pdf]

**Supplementary Table 1 – Modulation of the Endocannabinoid System in pathophysiological conditions.**

|                                  | <b>Models</b>                                                                                                   | <b>Cannabinoid Modulation</b>                              | <b>Effects</b>                                                                                                                                                                      |
|----------------------------------|-----------------------------------------------------------------------------------------------------------------|------------------------------------------------------------|-------------------------------------------------------------------------------------------------------------------------------------------------------------------------------------|
| <b>Alzheimer's Disease</b>       | Microglial cell cultures (mice) + A $\beta$ 1-42                                                                | JWH-015                                                    | ↓ Production of proinflammatory cytokines; ↑ A $\beta$ phagocytosis [243]                                                                                                           |
|                                  | Microglia cell cultures (rat) + A $\beta$ 1-40                                                                  | WIN 55,212-2; JWH-133; HU-210                              | ↓ Microglial activation [275]                                                                                                                                                       |
|                                  | Microglia-neuron co-cultures (rat) + A $\beta$ 1-40                                                             | WIN 55,212-2; JWH-133                                      | ↓ Microglial induced neurotoxicity by ↑ neuronal survival [275]                                                                                                                     |
|                                  | Hippocampal neuron cultures (rat) + A $\beta$ 25-35/A $\beta$ 1-42                                              | 2-AG; URB602, JZL184                                       | ↓ Neurodegeneration and apoptosis [289]                                                                                                                                             |
|                                  | Cortical neuron cultures (rat) + A $\beta$ 1-42                                                                 | AEA                                                        | ↑ Notch-1 signalling [316]                                                                                                                                                          |
|                                  | PC12 cells (rat) + A $\beta$ 1-40                                                                               |                                                            | ↓ Neuronal cell loss [290]                                                                                                                                                          |
|                                  | PC12 cells (rat) + A $\beta$ 1-42                                                                               | CBD                                                        | ↑ Cell survival; ↓ ROS production, lipid peroxidation [292]                                                                                                                         |
|                                  | SHSY5Y cell cultures (human) + A $\beta$ 1-42                                                                   |                                                            | ↓ A $\beta$ neurotoxicity [296]                                                                                                                                                     |
|                                  | SHSY5Y(APP+) cell cultures (human)                                                                              |                                                            | ↓ A $\beta$ production; ↑ Cell survival [293]                                                                                                                                       |
|                                  | HEK(APP+) cell cultures (human); mixed glia-neuron cultures (mice) transfected with APP <sup>swe</sup> mutation | PPAR $\gamma$ activation                                   | ↓ APP expression; ↑ A $\beta$ clearance [294,295]                                                                                                                                   |
|                                  | Icv A $\beta$ 1-42 injection (mice); Intracortical A $\beta$ 1-42 injection (rats)                              | VDM-11                                                     | ↓ Hippocampal neuronal damage (rats); memory impairment (mice) [276]                                                                                                                |
|                                  | Icv A $\beta$ 1-40 injection (mice); Icv A $\beta$ 25-35 injection (rats)                                       | CBD (mice); WIN 55,212-2 (rats)                            | ↓ Microglial activation; spatial learning/memory impairment [244,275]                                                                                                               |
|                                  | Intrahippocampal A $\beta$ 1-42 injection (rats)                                                                | WIN 55,212-2                                               | ↓ Neuroinflammation; spatial learning/memory impairment [298]                                                                                                                       |
|                                  | Intrahippocampal A $\beta$ 1-42 injection (rats/mice)                                                           | CBD                                                        | ↓ Reactive gliosis; rescued neuronal integrity; repaired AHN [201,302]                                                                                                              |
|                                  | APP <sup>swe</sup> mice                                                                                         | JWH-133                                                    | ↓ Microglial activation, COX-2, TNF- $\alpha$ mRNA, A $\beta$ levels, memory deficits [245]                                                                                         |
|                                  |                                                                                                                 | WIN 55,212-2                                               | ↓ GSK3 $\beta$ activity and levels of A $\beta$ [245]                                                                                                                               |
|                                  | 5xFAD mice                                                                                                      | $\Delta^9$ -THC; JZL184                                    | ↓ Occurrence of neuritic plaques [307,308]                                                                                                                                          |
|                                  |                                                                                                                 | MAGL genetic ablation; JZL184                              | ↓ Reactive gliosis, pro-inflammatory cytokines, density of A $\beta$ plaques; spatial learning/memory impairment [297]                                                              |
|                                  | APP/PS1 mice                                                                                                    | ACEA                                                       | ↓ GSK3 $\beta$ , tau phosphorylation, astrogliosis, cognitive impairment; no effect on A $\beta$ production, aggregation or clearance [299]                                         |
|                                  |                                                                                                                 | MDA7                                                       | ↓ Microgliosis; ↑ A $\beta$ clearance, hippocampal Sox2 expression, synaptic plasticity, spatial learning/memory [300]                                                              |
|                                  |                                                                                                                 | JWH-133                                                    | ↓ Microgliosis, pro-inflammatory cytokines, GSK3 $\beta$ activity, tau phosphorylation, cognitive impairment; no effect on A $\beta$ production [301]                               |
|                                  |                                                                                                                 | $\Delta^9$ -THC; CBD                                       | ↑ Memory performance [303,304]                                                                                                                                                      |
|                                  |                                                                                                                 | $\Delta^9$ -THC+CBD                                        | ↓ Soluble A $\beta$ 1-42, reactive gliosis, learning impairments (young animals); ↓ Memory deficits with no effect on A $\beta$ burden or reactive gliosis (aged animals) [303,304] |
| CBD                              |                                                                                                                 | ↓ Memory deficits; no effect on A $\beta$ burden [305,306] |                                                                                                                                                                                     |
| <i>Post-mortem</i> human samples | JWH-015                                                                                                         | ↑ A $\beta$ phagocytosis [291]                             |                                                                                                                                                                                     |

|              |            |                                                                                                            |
|--------------|------------|------------------------------------------------------------------------------------------------------------|
| Human trials | Dronabinol | ↓ Aggressive behaviour, ↑ body weight [268]; ↓ Motor agitation [269]; ↓ Nocturnal motor activity [270,271] |
|--------------|------------|------------------------------------------------------------------------------------------------------------|

### Supplementary Table 1 – Continuation

|                                                    |                                                                                   |                                                                      |                                                                                                                                   |
|----------------------------------------------------|-----------------------------------------------------------------------------------|----------------------------------------------------------------------|-----------------------------------------------------------------------------------------------------------------------------------|
| <b>Parkinson's Disease</b>                         | Human cord blood iPSCs                                                            | $\Delta^9$ -THC, AEA                                                 | Concentration-dependent actions of cannabinoids on neuronal function [190]                                                        |
|                                                    | SVZ neurospheres (mice)                                                           | R-m-AEA                                                              | No increase in TH-positive cells [198]                                                                                            |
|                                                    | Cerebellar granule cell cultures (mice) + 6-OHDA / unilateral injection of 6-OHDA | $\Delta^9$ -THC; CBD; HU-210                                         | ↑ Neuroprotection [341]                                                                                                           |
|                                                    | Rotenone-induced rat model                                                        | BCP; AM-630                                                          | ↑ Neuroprotection and antioxidant properties [342]                                                                                |
|                                                    | Human trials                                                                      | Cannabis                                                             | ↓ Bradykinesia, muscle rigidity and tremors [329]                                                                                 |
| <b>Multiple Sclerosis</b>                          | Splenic cell cultures (mice) / EAE mice                                           | CBD                                                                  | ↓ EAE severity; ↓ Pro-inflammatory cytokines; ↑ Anti-inflammatory cytokine release [384]                                          |
|                                                    |                                                                                   | CBD                                                                  | ↓ Inflammatory immune cells; ↓ Demyelination [406]                                                                                |
|                                                    |                                                                                   | $\Delta^9$ -THC; CBD                                                 | ↓ IL-17 and IL-6 secretion; ↑ IL-10 secretion [385]                                                                               |
|                                                    | EAE mice                                                                          | Gp1a                                                                 | ↓ Clinical scores and CD4 <sup>+</sup> T cells in the CNS [388]                                                                   |
|                                                    |                                                                                   | WIN 55,212-2; SR141716; SR144528                                     | ↓ Leukocyte/endothelial cell interaction and leukocyte trafficking into the CNS [387]                                             |
|                                                    |                                                                                   | $\Delta^9$ -THC; CB1R KO in neurons or T cells and CB2RKO mice       | Amount of CB1R and CB2R activation determined EAE severity; CB2R as a regulator of EAE clinical disease in the steady state [379] |
|                                                    |                                                                                   | CB1R KO                                                              | ↑ Neurodegeneration and axonal loss; ↓ Anti-inflammatory responses [377]                                                          |
|                                                    | TMEV-IDD mouse model                                                              | UCM707                                                               | ↑ Motor function; ↓ Microglia/macrophage activation, pro-inflammatory cytokine release [383]                                      |
|                                                    | Human trials                                                                      | Cannabis                                                             | ↓ Spasticity, pain relief [389,399]                                                                                               |
|                                                    | <b>Epilepsy</b>                                                                   | Pilocarpine mouse model                                              | $\Delta^9$ -THC, WIN 55,212-2, SR141716                                                                                           |
| ACEA + anti-epileptic drugs                        |                                                                                   |                                                                      | ↑ Hippocampal neurogenesis [452,453]                                                                                              |
| Pilocarpine rat model                              |                                                                                   | WIN 55,212-2                                                         | Attenuated severity, duration and frequency of spontaneous recurrent seizures [435]                                               |
| Penicillin-induced epileptiform activity rat model |                                                                                   | AM-251, ACEA                                                         | Modulation of frequency of epileptiform activity [430]                                                                            |
| PTZ-induced clonic seizure mice                    |                                                                                   | WIN 55,212-2 + anti-epileptic drugs                                  | ↑ Anticonvulsant activity [436, 437, 438]                                                                                         |
| Maximal electroshock-induced seizures mice         |                                                                                   | ACEA, PMSF + anti-epileptic drugs                                    |                                                                                                                                   |
| Kindling mouse model of temporal lobe epilepsy     |                                                                                   | JZL184                                                               | Delayed development of generalized seizures, without acute anticonvulsive effects [432]                                           |
|                                                    |                                                                                   | WIN 55,212-2                                                         | Delayed progression of seizure severity [433]                                                                                     |
|                                                    |                                                                                   | URB597                                                               | ↓ Neurogenesis [433]                                                                                                              |
|                                                    | CB1R KO; SR141716                                                                 | eCBs signalling affected the termination of epileptic activity [434] |                                                                                                                                   |

**Supplementary Table 1 – Continuation**

|                           |                                                                                                                |                                              |                                                                     |
|---------------------------|----------------------------------------------------------------------------------------------------------------|----------------------------------------------|---------------------------------------------------------------------|
| <b>Anxiety/Depression</b> | Wild-type mice                                                                                                 | CP 55,940                                    | Anxiolytic- (low dose) or anxiogenic-like effects (high dose) [479] |
|                           |                                                                                                                | CP 55,940; WIN 55,212-2;<br>AM404; URB597    |                                                                     |
|                           |                                                                                                                | SR141716                                     | Anxiolytic-like effects [507, 508, 516, 521, 536]                   |
|                           |                                                                                                                | JWH-015                                      |                                                                     |
|                           |                                                                                                                | AM630                                        |                                                                     |
|                           |                                                                                                                | URB597; JZL184                               |                                                                     |
|                           |                                                                                                                | $\Delta^9$ -THC; SR141716; AM251             | Anxiogenic-like effects [507, 521]                                  |
|                           |                                                                                                                | AM630; JWH-133                               |                                                                     |
|                           |                                                                                                                | CBD                                          |                                                                     |
|                           |                                                                                                                | Oleamide; JWH-133; AM630                     |                                                                     |
|                           |                                                                                                                | $\Delta^9$ -THC; CBC; CBD; ACEA;<br>SR141716 | Antidepressant-like effects [481, 482, 484, 522, 523, 531, 543–545] |
|                           |                                                                                                                | PF3845                                       |                                                                     |
|                           |                                                                                                                | BCP                                          |                                                                     |
|                           |                                                                                                                | JZL184; KML29                                | Antidepressant and anxiolytic-like effects [517, 529]               |
|                           |                                                                                                                | URB597; FAAH KO                              |                                                                     |
|                           |                                                                                                                | SR141716; CB1R KO                            | Anxiolytic-like effects [505, 530]                                  |
|                           |                                                                                                                | CB1R KO                                      | Anxiogenic-like effects [508]                                       |
|                           |                                                                                                                | CB2R KO                                      | Anxiogenic- and depressive-like behaviours [526,527]                |
|                           |                                                                                                                | CB2R overexpression                          | Antidepressant- and anxiolytic-like effects [523]                   |
|                           |                                                                                                                | Wild-type rats                               | AM404; HU-210; Oleamide;<br>WIN 55,212-2                            |
| WIN 55,212-2              | Anxious-like behaviour and spatial learning/memory deficits; ↓ Dorsal hippocampal neurogenesis [498]           |                                              |                                                                     |
| URB597                    | Rescued $\Delta^9$ -THC-induced depressive-like behaviour and deficits in AHN [499]                            |                                              |                                                                     |
| HU-210                    | ↑ Response to stress ↓ hippocampal neurogenesis [500]; Antidepressant- and anxiolytic-like effects, ↑AHN [503] |                                              |                                                                     |
| SR141716                  | Anxiogenic-like effects [506]; Induced depressive-like behaviours, ↓ AHN, cell survival [509]                  |                                              |                                                                     |
| CBD                       | Antidepressant-like effects; anxiolytic-like effects [541]                                                     |                                              |                                                                     |

Supplementary Table 1 – Continuation

|                    |                                                |                                  |                                                                                |
|--------------------|------------------------------------------------|----------------------------------|--------------------------------------------------------------------------------|
| Anxiety/Depression | Wild-type mice; CMS mouse model of depression  | CB1R KO                          | ↑ Aggressive, anxiogenic- and depressive-like behaviours [515]                 |
|                    | Wild-type rats; CMS mouse model of depression  | SR141716                         | Antidepressant-like effects [505]                                              |
|                    | CMS mouse model of depression                  | JZL184                           | Antidepressant- and anxiolytic-like effects[534,535]; rescue of AHN [534]      |
|                    |                                                | CBD                              | Anxiolytic-like effects; Promoted AHN [203]                                    |
|                    | CMS rat model of depression                    | WIN 55,212-2                     | Prevented emotional learning deficits and LTP impairment [487]                 |
|                    |                                                | URB597                           | Antidepressant-like effects [532]                                              |
|                    | Olfactory bulbectomy mouse model of depression | CBD                              | Antidepressant and anxiolytic-like effects [540]                               |
|                    | Olfactory bulbectomy rat model of depression   | $\Delta^9$ -THC; SR141716        | Antidepressant-like behaviour [485]                                            |
|                    | Restraint stress mouse model of depression     | CP 55,940; URB597                | Antidepressant-like behaviour [486]                                            |
|                    | FSL and LH rat models of depression            | CBD                              | Antidepressant-like effects [545]                                              |
|                    |                                                | Cannabis (chronic use)           | ↑ Risk of suffering from anxiety and/or depressive disorders [490,492,494–496] |
|                    |                                                | Human trials                     | SR141716                                                                       |
|                    | CBD                                            | Induced anxiolytic effects [546] |                                                                                |

**Abbreviations:** (2-Methyl-1-propyl-1*H*-indol-3-yl)-1-naphthalenylmethanone (**JWH-015**); [2,3-Dihydro-5-methyl-3-(4-morpholinylmethyl)pyrrolo[1,2,3-*de*]-1,4-benzoxazin-6-yl]-1-naphthalenylmethanone mesylate (**WIN55,212-2**); (6*aR*,10*aR*)-3-(1,1-Dimethylbutyl)-6*a*,7,10,10*a*-tetrahydro-6,6,9-trimethyl-6*H*-dibenzo[*b,d*]pyran (**JWH-133**); (6*aR*)-*trans*-3-(1,1-Dimethylheptyl)-6*a*,7,10,10*a*-tetrahydro-1-hydroxy-6,6-dimethyl-6*H*-dibenzo[*b,d*]pyran-9-methanol (**HU-210**); 2-Arachidonoylglycerol (**2-AG**); *N*-[1,1'-Biphenyl]-3-yl-carbamic acid cyclohexyl ester (**URB602**); 4-[*Bis*(1,3-benzodioxol-5-yl)hydroxymethyl]-1-piperidinecarboxylic acid 4-nitrophenyl ester (**JZL184**); Anandamide (**AEA**); Cannabidiol (**CBD**); Peroxisome proliferator-activated receptor  $\gamma$  (**PPAR $\gamma$** ); (5*Z*,8*Z*,11*Z*,14*Z*)-*N*-(4-Hydroxy-2-methylphenyl)-5,8,11,14-eicosatetraenamide (**VDM-11**);  $\Delta^9$ -tetrahydrocannabinol ( **$\Delta^9$ -THC**); *N*-(2-Chloroethyl)-5*Z*,8*Z*,11*Z*,14*Z*-eicosatetraenamide (**ACEA**); 1-[(3-benzyl-3-methyl-2,3-dihydro-1-benzofuran-6-yl)carbonyl]piperidine (**MDA7**); (*R*)-(+)-Methanandamide (**R-m-AEA**);  $\beta$ -caryophyllene (**BCP**); 6-Iodo-2-methyl-1-[2-(4-morpholinyl)ethyl]-1*H*-indol-3-yl]-(4-methoxyphenyl)methanone (**AM-630**); *N*-(Piperidin-1-yl)-1-(2,4-dichlorophenyl)-1,4-dihydro-6-methylindeno[1,2-*c*]pyrazole-3-carboxamide (**Gp1a**); *N*-(Piperidin-1-yl)-5-(4-chlorophenyl)-1-(2,4-dichlorophenyl)-4-methyl-1*H*-pyrazole-3-carboxamide hydrochloride (**SR141716**); 5-(4-Chloro-3-methylphenyl)-1-[(4-methylphenyl)methyl]-*N*-[(1*S*,2*S*,4*R*)-1,3,3-trimethylbicyclo[2.2.1]hept-2-yl]-1*H*-pyrazole-3-carboxamide (**SR144528**); (5*Z*,8*Z*,11*Z*,14*Z*)-*N*-(3-Furanylmethyl)-5,8,11,14-eicosatetraenamide (**UCM707**); *N*-(Piperidin-1-yl)-5-(4-iodophenyl)-1-(2,4-dichlorophenyl)-4-methyl-1*H*-pyrazole-3-carboxamide (**AM-251**); Phenylmethylsulfonyl fluoride (**PMSF**); Cyclohexylcarbamic acid 3'-(Aminocarbonyl)-[1,1'-biphenyl]-3-yl ester (**URB597**); (-)-*cis*-3-[2-Hydroxy-4-(1,1-dimethylheptyl)phenyl]-*trans*-4-(3-hydroxypropyl)cyclohexanol (**CP55,940**); *N*-(4-Hydroxyphenyl)-5*Z*,8*Z*,11*Z*,14*Z*-eicosatetraenamide (**AM404**); Cannabichromene (**CBC**); Fatty Acid Amide Hydrolase piperidine urea inhibitor (**PF3845**); 4-[*Bis*(1,3-benzodioxol-5-yl)hydroxymethyl]-1-piperidinecarboxylic acid 2,2,2-trifluoro-1-(trifluoromethyl)ethyl ester (**KML29**)
